# Supplementary material for: RegioML: predicting the regioselectivity of electrophilic aromatic substitution reactions using machine learning
Source: Royal Society of Chemistry journal article supplement (doi:10.1039/d1dd00032b), 2022-01-01
Supplement: d1dd00032b1.pdf [file d1dd00032b1.pdf]

---

## Supporting Information

---

Table S1: The training, test, and out-sample sets contain, respectively, 372, 205, and 381 different aromatic rings and the latter two sets contain 48 and 183 rings not found in the training set. Similarly, the training, test, and out-sample sets contain, respectively, 1553, 620, and 1714 different substituents and the latter two sets contain 210 and 1180 substituents not found in the training set. The SMILES strings for all rings and substituents are can be found in the data repository.

|               | Aromatic rings | Not in training set | Substituents | Not in training set |
|---------------|----------------|---------------------|--------------|---------------------|
| Training set  | 372            | 0                   | 1553         | 0                   |
| Test set      | 205            | 48                  | 620          | 210                 |
| Out-of-sample | 381            | 183                 | 1714         | 1180                |

Group 2

Ungroup

Structure

On all atoms

OR

Structure

On all atoms

NOT

Group 4

Ungroup

Structure

On all atoms

OR

Structure

On all atoms

AND

Solvent (Reaction Det... contains \* \*

AND

Number of Reaction Steps = 1

Figure S1: The set of queries used to extract the reaction data from Reaxys.

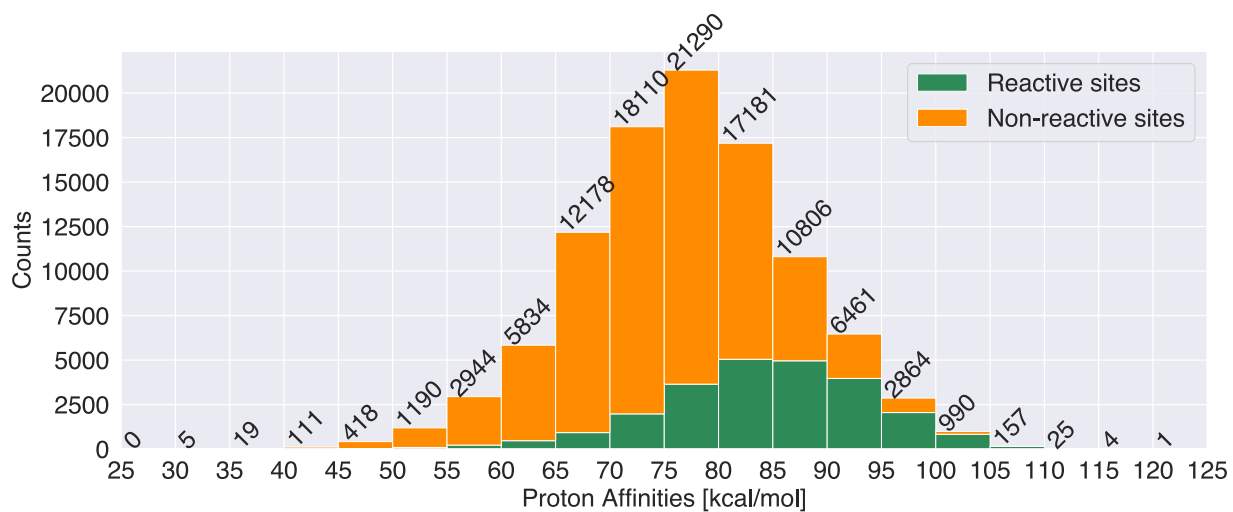

Figure S2: The distribution of calculated proton affinities for all of the collected data using the original version of RegioSQM20.

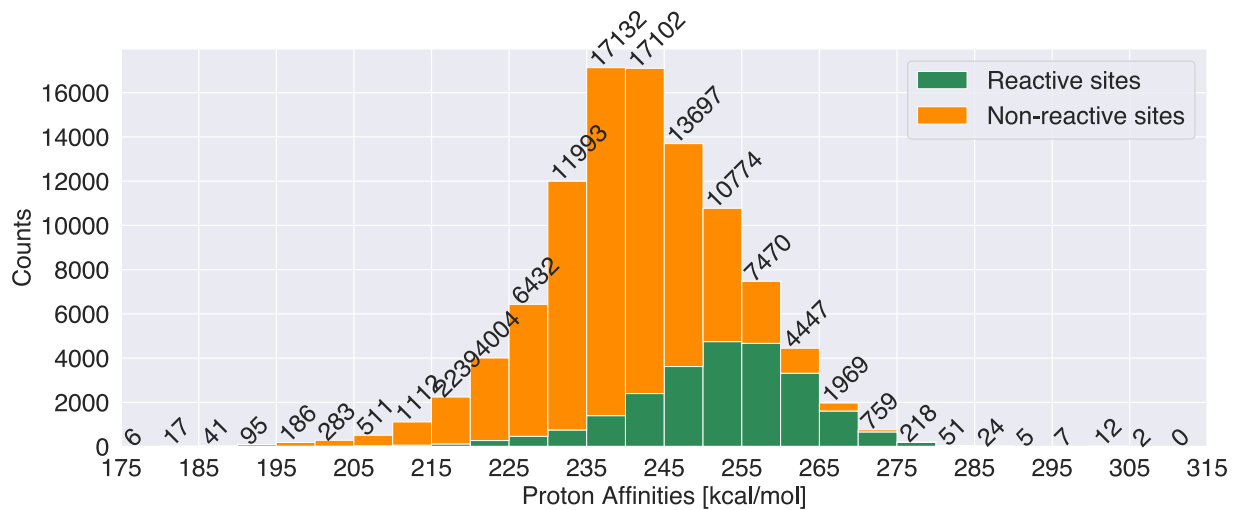

Figure S3: The distribution of calculated proton affinities for all of the collected data using the extended version of RegioSQM20.

Table S2: A description of the different atomic descriptors used for machine learning. The descriptors are based on the CM5 charge scheme.

| Descriptor abbreviation | Description                                                                      |
|-------------------------|----------------------------------------------------------------------------------|
| Sorted-shell            | Charge shell descriptor with values sorted by Cahn-Ingold-Prelog rules           |
| CS                      | Charge shell descriptor with average charge per shell                            |
| CRDF                    | Spatial charge radial distribution function                                      |
| CACF                    | Spatial charge autocorrelation function (split into positive and negative parts) |
| MS                      | Mass shell; the elements are the sums of the masses of each shell                |
| GACF                    | Topological charge autocorrelation function                                      |
| Combinatorial           | Combination of shorted-shell, CACF, and CS                                       |

Table S3: 5-fold cross-validation AUC-ROC scores for the seven different atomic descriptors using the LightGBM model on the randomly split training set. AUC-ROC corresponds to the area under the curve of the receiver operating characteristic curve.

| Descriptor    | Settings                                                                                                | Dimensions | 5-fold cross-validation AUC-ROC score |
|---------------|---------------------------------------------------------------------------------------------------------|------------|---------------------------------------|
| Sorted-shell  | shells: 3                                                                                               | 53         | $0.949 \pm 0.002$                     |
| CS            | shells: 3                                                                                               | 4          | $0.891 \pm 0.003$                     |
| CRDF          | $r_{\min}$ : 1, $r_{\max}$ : 6, $\beta$ : 20,<br>step size: 0.2                                         | 25         | $0.931 \pm 0.002$                     |
| CACF          | $r_{\min}$ : 1, $r_{\max}$ : 8,<br>step size: 0.5                                                       | 28         | $0.921 \pm 0.002$                     |
| MS            | shells: 2                                                                                               | 3          | $0.782 \pm 0.005$                     |
| GACF          | $r_{\min}$ : 1, $r_{\max}$ : 3                                                                          | 6          | $0.898 \pm 0.004$                     |
| Combinatorial | sorted-shell (shells: 2),<br>CACF ( $r_{\min}$ : 1, $r_{\max}$ : 10,<br>step size: 0.2), CS (shells: 7) | 115        | $0.946 \pm 0.002$                     |

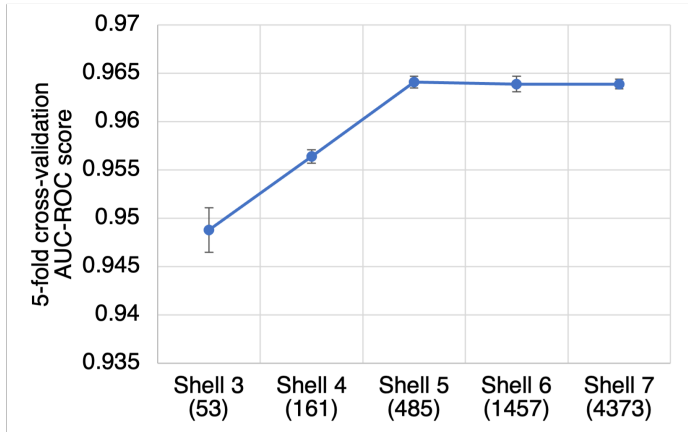

Figure S4: Increasing the number of included shells in the sorted-shell descriptor. The numbers in parenthesis correspond to the length of the feature vectors.

## Initial ML screening with PyCaret

PyCaret version 2.2.0<sup>33</sup> is used as an initial screening of 17 regression models and 13 classification models to find promising models. To evaluate the performance of the models, we use a 5-fold cross-validation scheme of the atomic data for atoms in molecules belonging to the randomly split training set. The atomic data consist of the sorted-shell descriptor with 5 shells in combination with either a binary label corresponding to whether or not a bromination reaction has been experimentally observed on the specific site or the calculated proton affinity obtained by the original RegioSQM20 method. The sorted-shell descriptor with 3 shells and the combinatorial descriptor were also tested in this initial screening, but the ranking of the different models were similar to those presented in Figures S5 and S6.

The top-3 performing models for both tasks are the extra-trees and random forest models as implemented in scikit-learn 0.24.2,<sup>36</sup> and the light gradient boosting machine (LightGBM) model version 3.1.1<sup>35</sup> (see Figures S5 and S6).

Due to the good performance of the LightGBM model, we also tested a similar model called extreme gradient boosting (XGBoost) version 1.4.0, and a new deep neural network architecture for tabular data called TabNet by Google Cloud AI, which has recently outperformed several gradient boosting algorithms on different tasks. In the case of the latter, we used a pyTorch implementation of TabNet by DreamQuark. The results of the different optimized machine learning models can be found in Table S4.

|                 | Model                           | Accuracy | AUC    | Recall | Prec.  | F1     | Kappa  | MCC    | TT (Sec) |
|-----------------|---------------------------------|----------|--------|--------|--------|--------|--------|--------|----------|
| <b>et</b>       | Extra Trees Classifier          | 0.9204   | 0.9549 | 0.7655 | 0.8919 | 0.8239 | 0.7729 | 0.7766 | 14.456   |
| <b>rf</b>       | Random Forest Classifier        | 0.9164   | 0.9509 | 0.7520 | 0.8869 | 0.8139 | 0.7604 | 0.7648 | 13.166   |
| <b>lightgbm</b> | Light Gradient Boosting Machine | 0.9098   | 0.9463 | 0.7490 | 0.8619 | 0.8015 | 0.7435 | 0.7466 | 2.332    |
| <b>knn</b>      | K Neighbors Classifier          | 0.8891   | 0.9145 | 0.7256 | 0.7998 | 0.7609 | 0.6889 | 0.6902 | 223.358  |
| <b>gbc</b>      | Gradient Boosting Classifier    | 0.8849   | 0.9114 | 0.6581 | 0.8338 | 0.7355 | 0.6633 | 0.6709 | 39.038   |
| <b>dt</b>       | Decision Tree Classifier        | 0.8650   | 0.8197 | 0.7316 | 0.7185 | 0.7250 | 0.6355 | 0.6356 | 3.532    |
| <b>ada</b>      | Ada Boost Classifier            | 0.8571   | 0.8891 | 0.5968 | 0.7646 | 0.6702 | 0.5808 | 0.5882 | 9.654    |
| <b>lr</b>       | Logistic Regression             | 0.8045   | 0.8019 | 0.3475 | 0.6970 | 0.4636 | 0.3601 | 0.3928 | 12.014   |
| <b>ridge</b>    | Ridge Classifier                | 0.8028   | 0.0000 | 0.3092 | 0.7206 | 0.4326 | 0.3356 | 0.3798 | 0.470    |
| <b>lda</b>      | Linear Discriminant Analysis    | 0.8026   | 0.8023 | 0.3687 | 0.6720 | 0.4760 | 0.3669 | 0.3921 | 4.776    |
| <b>svm</b>      | SVM - Linear Kernel             | 0.8010   | 0.0000 | 0.2907 | 0.7304 | 0.4138 | 0.3203 | 0.3705 | 1.312    |
| <b>qda</b>      | Quadratic Discriminant Analysis | 0.7569   | 0.5010 | 0.0028 | 0.5162 | 0.0056 | 0.0031 | 0.0235 | 3.484    |
| <b>nb</b>       | Naive Bayes                     | 0.2583   | 0.5070 | 0.9893 | 0.2456 | 0.3936 | 0.0063 | 0.0382 | 0.354    |

Figure S5: 5-fold cross-validation results on the randomly split training set using PyCaret w.r.t. classification.

|                 | Model                           | MAE    | MSE       | RMSE    | R2       | RMSLE  | MAPE   | TT (Sec) |
|-----------------|---------------------------------|--------|-----------|---------|----------|--------|--------|----------|
| <b>et</b>       | Extra Trees Regressor           | 2.1592 | 9.8424    | 3.1367  | 0.8991   | 0.0416 | 0.0286 | 78.342   |
| <b>rf</b>       | Random Forest Regressor         | 2.5242 | 12.9645   | 3.5998  | 0.8671   | 0.0475 | 0.0334 | 117.438  |
| <b>lightgbm</b> | Light Gradient Boosting Machine | 2.7021 | 13.2370   | 3.6373  | 0.8643   | 0.0476 | 0.0355 | 1.998    |
| <b>gbr</b>      | Gradient Boosting Regressor     | 3.8416 | 24.9357   | 4.9930  | 0.7444   | 0.0658 | 0.0509 | 38.392   |
| <b>knn</b>      | K Neighbors Regressor           | 3.4953 | 26.5942   | 5.1566  | 0.7274   | 0.0682 | 0.0466 | 113.402  |
| <b>dt</b>       | Decision Tree Regressor         | 3.7041 | 29.2604   | 5.4091  | 0.7000   | 0.0710 | 0.0489 | 1.950    |
| <b>ada</b>      | AdaBoost Regressor              | 5.4477 | 45.7395   | 6.7616  | 0.5311   | 0.0892 | 0.0734 | 26.258   |
| <b>br</b>       | Bayesian Ridge                  | 5.6272 | 51.7361   | 7.1923  | 0.4696   | 0.0925 | 0.0737 | 2.690    |
| <b>ridge</b>    | Ridge Regression                | 5.6454 | 51.9586   | 7.2077  | 0.4674   | 0.0927 | 0.0740 | 0.238    |
| <b>omp</b>      | Orthogonal Matching Pursuit     | 5.7171 | 53.2138   | 7.2944  | 0.4545   | 0.0945 | 0.0750 | 0.284    |
| <b>huber</b>    | Huber Regressor                 | 5.6202 | 53.3203   | 7.3017  | 0.4534   | 0.0935 | 0.0730 | 21.912   |
| <b>par</b>      | Passive Aggressive Regressor    | 6.1183 | 62.6318   | 7.8882  | 0.3581   | 0.1012 | 0.0787 | 1.406    |
| <b>en</b>       | Elastic Net                     | 7.6909 | 96.5902   | 9.8279  | 0.0098   | 0.1293 | 0.1034 | 0.176    |
| <b>lasso</b>    | Lasso Regression                | 7.7308 | 97.5523   | 9.8767  | -0.0001  | 0.1300 | 0.1040 | 0.158    |
| <b>llar</b>     | Lasso Least Angle Regression    | 7.7308 | 97.5523   | 9.8767  | -0.0001  | 0.1300 | 0.1040 | 0.284    |
| <b>lr</b>       | Linear Regression               | 6.7012 | 9163.8243 | 70.4332 | -93.4221 | 0.1129 | 0.0890 | 0.732    |

Figure S6: 5-fold cross-validation results on the randomly split training set using PyCaret w.r.t. regression.

Table S4: Comparing different optimized machine learning methods using the random split of the molecular data to obtain the training and test sets.

| Method                      | Test set |      |      | Out-of-sample set |      |      |
|-----------------------------|----------|------|------|-------------------|------|------|
|                             | AUC-ROC  | ACC  | MCC  | AUC-ROC           | ACC  | MCC  |
| <b>Stratified split</b>     |          |      |      |                   |      |      |
| Random Forest               | 0.96     | 0.92 | 0.78 | 0.93              | 0.89 | 0.68 |
| Extra Trees                 | 0.96     | 0.93 | 0.79 | 0.93              | 0.89 | 0.68 |
| XGBoost                     | 0.96     | 0.93 | 0.80 | 0.93              | 0.89 | 0.70 |
| TabNet                      | 0.94     | 0.90 | 0.73 | 0.87              | 0.84 | 0.57 |
| LightGBM                    | 0.97     | 0.93 | 0.81 | 0.94              | 0.90 | 0.72 |
| LightGBM RegioSQM20         | 0.92     | 0.88 | 0.69 | 0.90              | 0.86 | 0.62 |
| LightGBM RegioSQM20 PBEh-3c | 0.92     | 0.90 | 0.72 | 0.90              | 0.87 | 0.65 |

Table S5: Comparing the use of either a stratified or random split of the molecular data to obtain the training and test sets. Note that the test sets are different between the stratified and random split, but the out-of-sample set is identical.

| Method                      | Test set |      |      | Out-of-sample set |      |      |
|-----------------------------|----------|------|------|-------------------|------|------|
|                             | AUC-ROC  | ACC  | MCC  | AUC-ROC           | ACC  | MCC  |
| <b>Stratified split</b>     |          |      |      |                   |      |      |
| LightGBM                    | 0.97     | 0.93 | 0.81 | 0.93              | 0.89 | 0.71 |
| LightGBM RegioSQM20         | 0.92     | 0.88 | 0.69 | 0.90              | 0.85 | 0.62 |
| LightGBM RegioSQM20 PBEh-3c | 0.92     | 0.90 | 0.72 | 0.90              | 0.87 | 0.65 |
| <b>Random split</b>         |          |      |      |                   |      |      |
| LightGBM                    | 0.97     | 0.93 | 0.81 | 0.94              | 0.90 | 0.72 |
| LightGBM RegioSQM20         | 0.92     | 0.88 | 0.69 | 0.90              | 0.86 | 0.62 |
| LightGBM RegioSQM20 PBEh-3c | 0.92     | 0.90 | 0.72 | 0.90              | 0.87 | 0.65 |

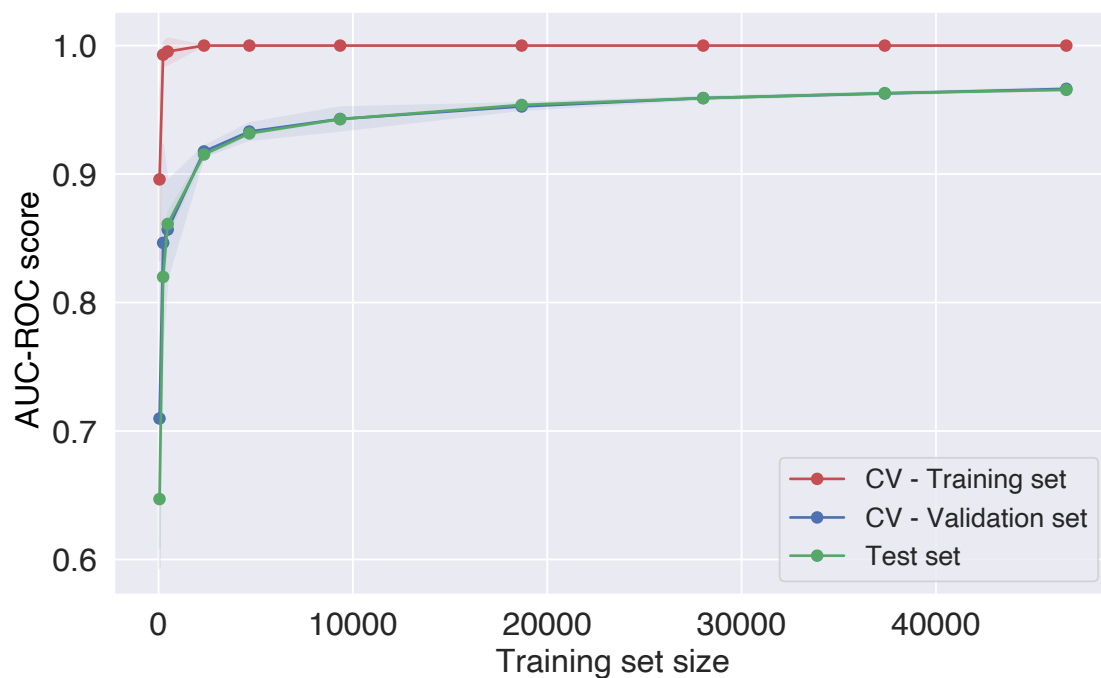

Figure S7: Learning curve for the LightGBM model. The training set size corresponds to the number of unique reaction sites as the model is trained on atoms instead of molecules.

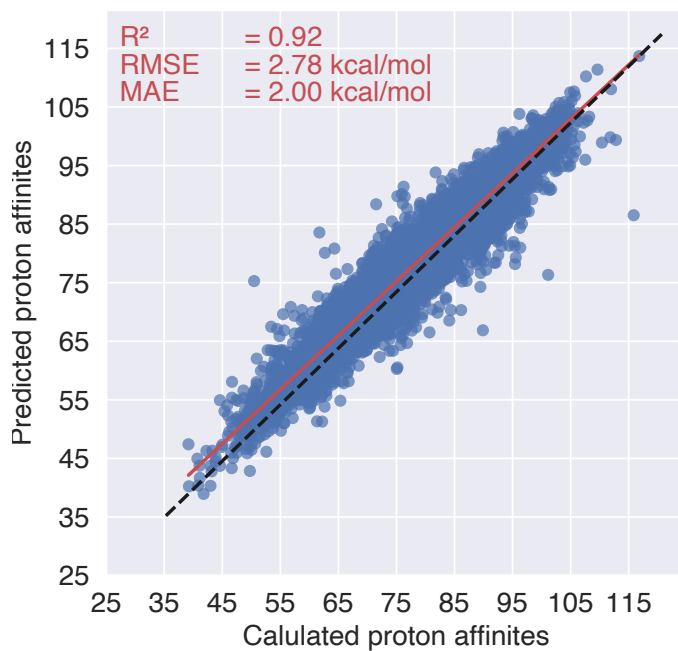

Figure S8: Performance of the LightGBM RegioSQM20 regression model showing the predicted proton affinities versus the calculated proton affinities for the test set.
